# Supplementary material for: A novel electroactive λ-MnO2/PPy/PSS core–shell nanorod coated electrode for selective recovery of lithium ions at low concentration
Source: Royal Society of Chemistry journal article supplement (doi:10.1039/c6ta05985f), 2016-01-01
Supplement: c6ta05985f1.pdf [file c6ta05985f1.pdf]

## Supplementary information

### **A Novel Electroactive $\lambda$ -MnO<sub>2</sub>/PPy/PSS Core-Shell Nanorods Coated Electrode for Selective Recovery of Lithium Ions with Ultra-Low Concentration**

Xiao Du<sup>a,b</sup>, Guoqing Guan<sup>b,c\*</sup>, Xiumin Li<sup>c</sup>, Ajay D Jagadale<sup>b</sup>, Xuli Ma<sup>a,b</sup>, Zhongde  
Wang<sup>a</sup>, Xiaogang Hao<sup>a\*</sup>, Abuliti Abudula<sup>c</sup>

<sup>a</sup>Department of Chemical Engineering, Taiyuan University of Technology, Taiyuan  
030024, China. E-mail: [xghao@tyut.edu.cn](mailto:xghao@tyut.edu.cn)

<sup>b</sup>North Japan Research Institute for Sustainable Energy (NJRISE), Hirosaki  
University, Matsubara, Aomori 030-0813, Japan. E-mail: [guan@hirosaki-u.ac.jp](mailto:guan@hirosaki-u.ac.jp)

<sup>c</sup>Graduate School of Science and Technology, Hirosaki University, 1-Bunkyocho,  
Hirosaki 036-8560, Japan

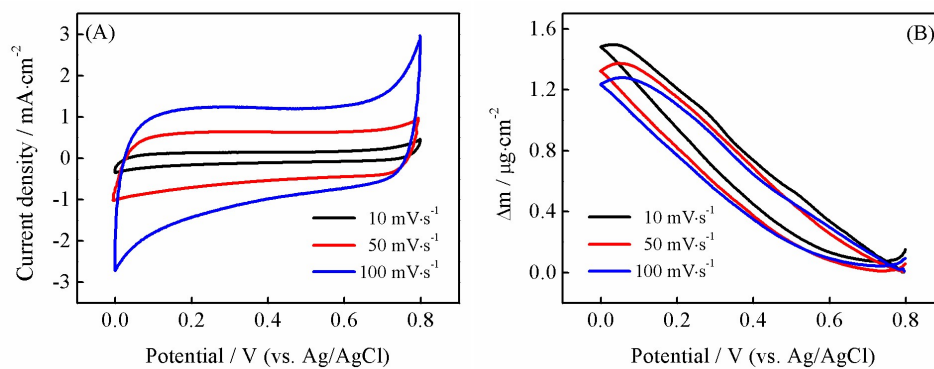

**Figure S1.** CV (A) and weight change (B) of  $\lambda$ -MnO<sub>2</sub>/PPy/PSS hybrid film in 0.5 mol L<sup>-1</sup> LiCl solution at different scan rates of 10, 50 and 100 mV s<sup>-1</sup>.

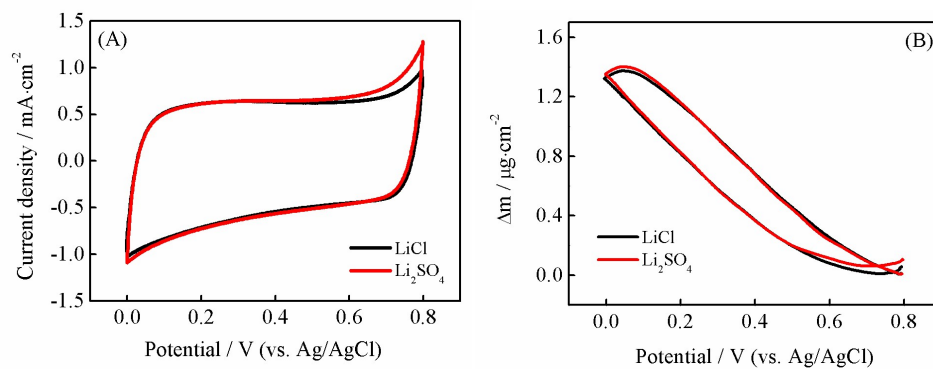

**Figure S2.** CV (A) and weight change (B) of  $\lambda$ -MnO<sub>2</sub>/PPy/PSS hybrid film in 0.5 mol L<sup>-1</sup> LiCl and 0.25 mol L<sup>-1</sup> Li<sub>2</sub>SO<sub>4</sub> solutions at a scan rate of 50 mV s<sup>-1</sup>.
